# Supplementary material for: Chronic grouped social restriction triggers long-lasting immune system adaptations
Source: PubMed Central journal article supplement (PMC5464898; doi:10.18632/oncotarget.16856), 2017-04-05
Supplement: oncotarget-08-33652-s001.pdf [file oncotarget-08-33652-s001.pdf]

# Chronic grouped social restriction triggers long-lasting immune system adaptations

## Supplementary Materials

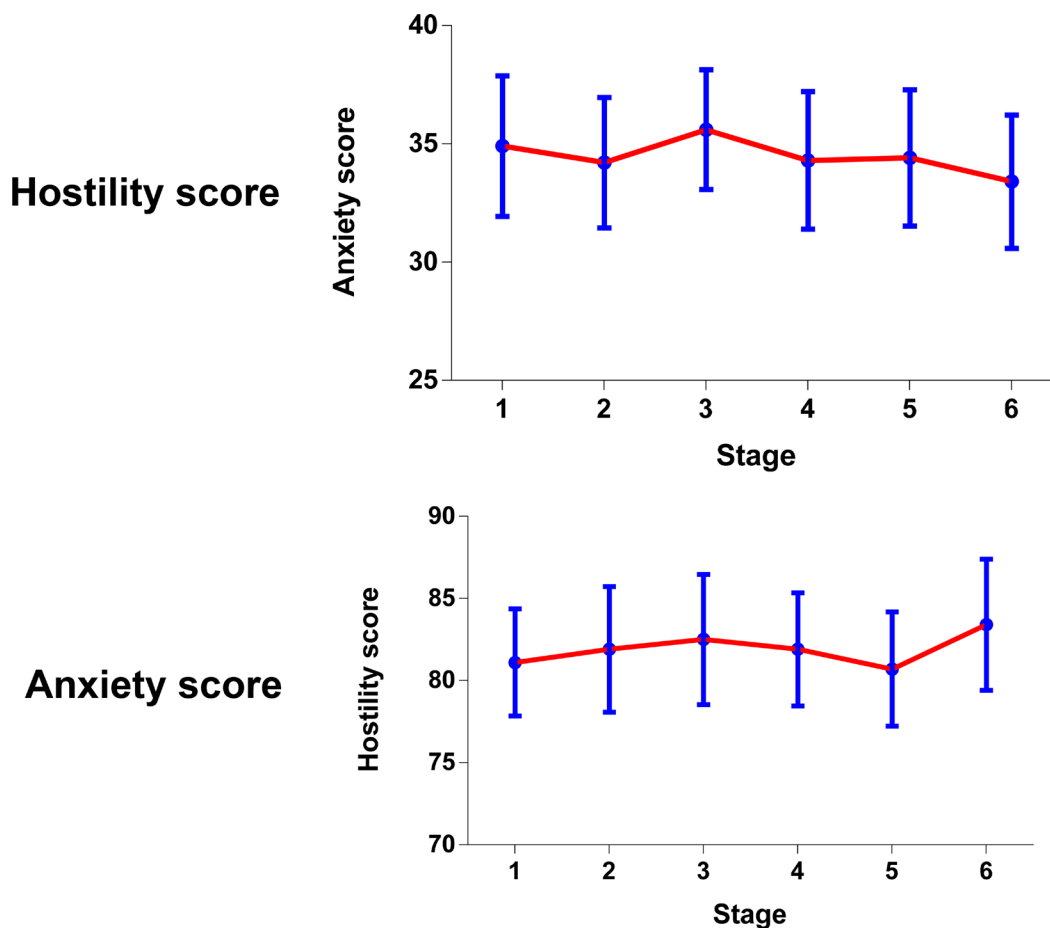

Supplementary Figure 1: The Hostility score (SHS scale) and anxiety score of 10 subjects at different stages of the social restriction period (every 25 days for a total of 150 days).

## Cortisol

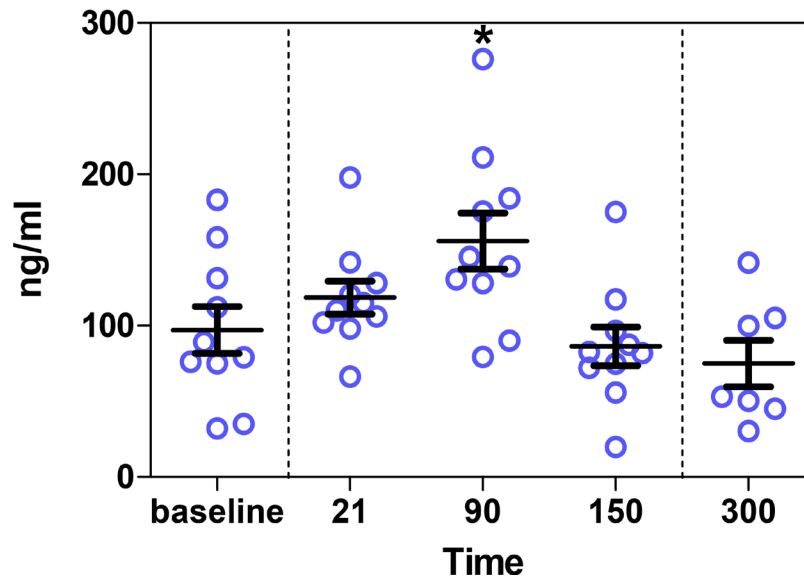

Supplementary Figure 2: The serum cortisol concentration at different time points ( $n = 10$ ).

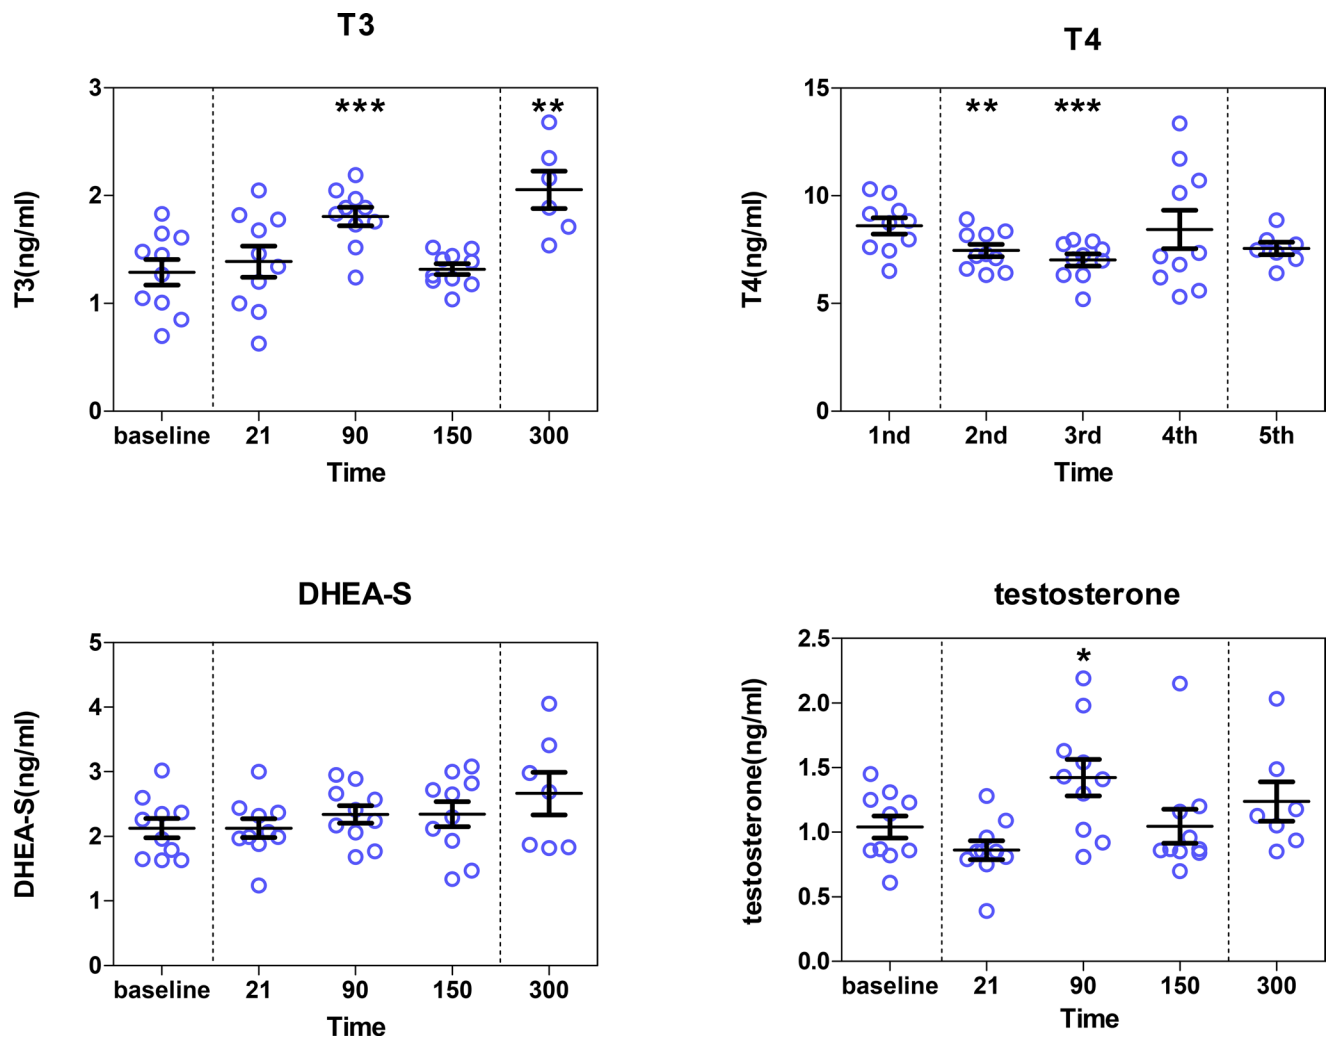

Supplementary Figure 3: The serum T3, T4, DHEA-S and testosterone concentration at different time points ( $n = 10$ ).

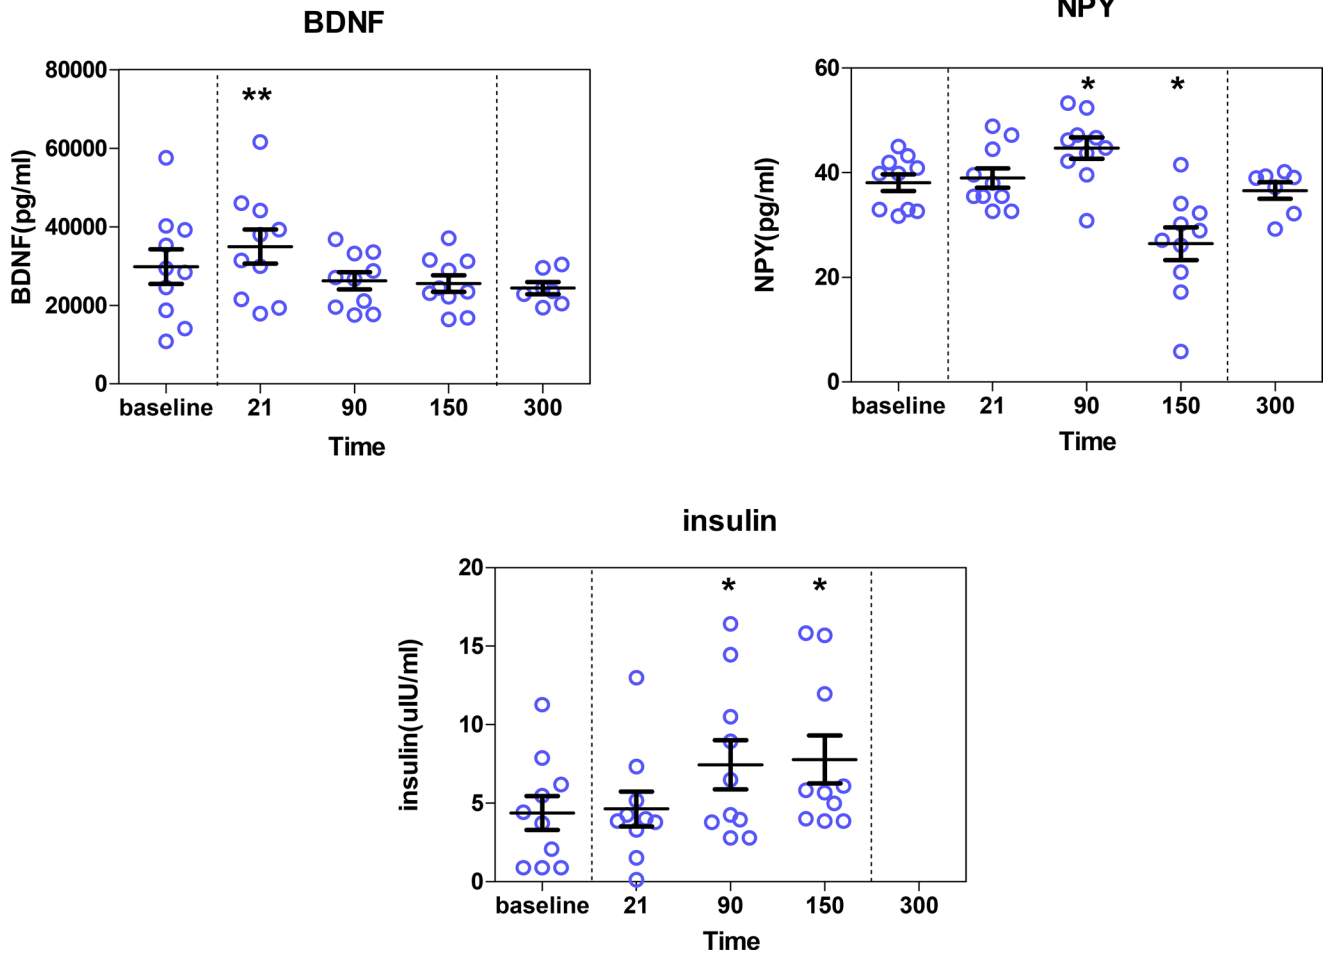

Supplementary Figure 4: The serum BDNF, NPY, and insulin concentration at different time points ( $n = 10$ ).

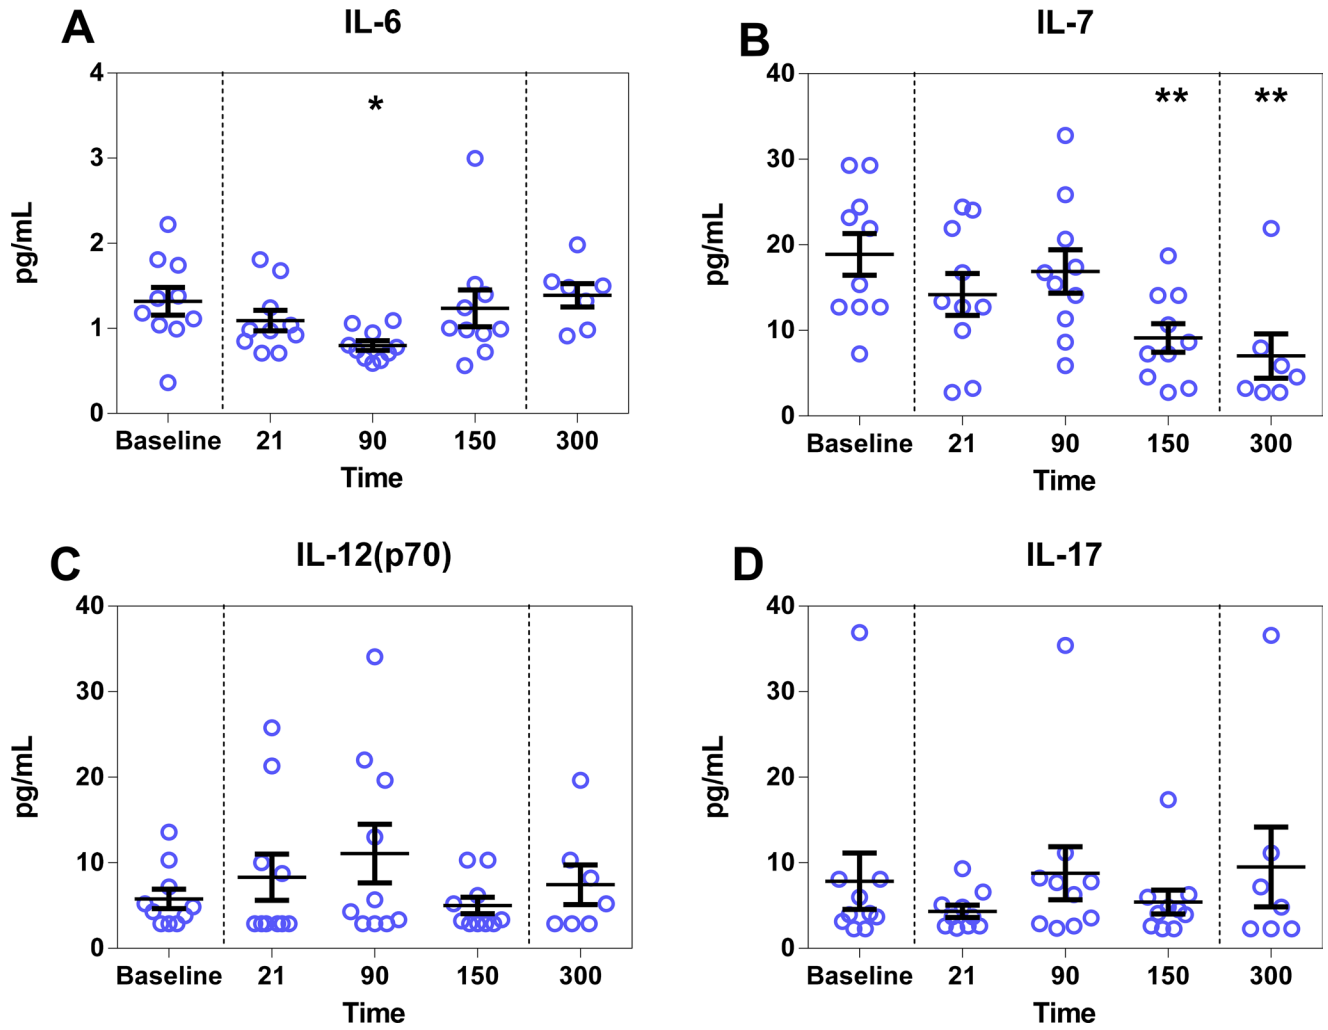

Supplementary Figure 5: The serum cytokine IL6,7,12 and 17 concentration at different time points ( $n = 10$ ).

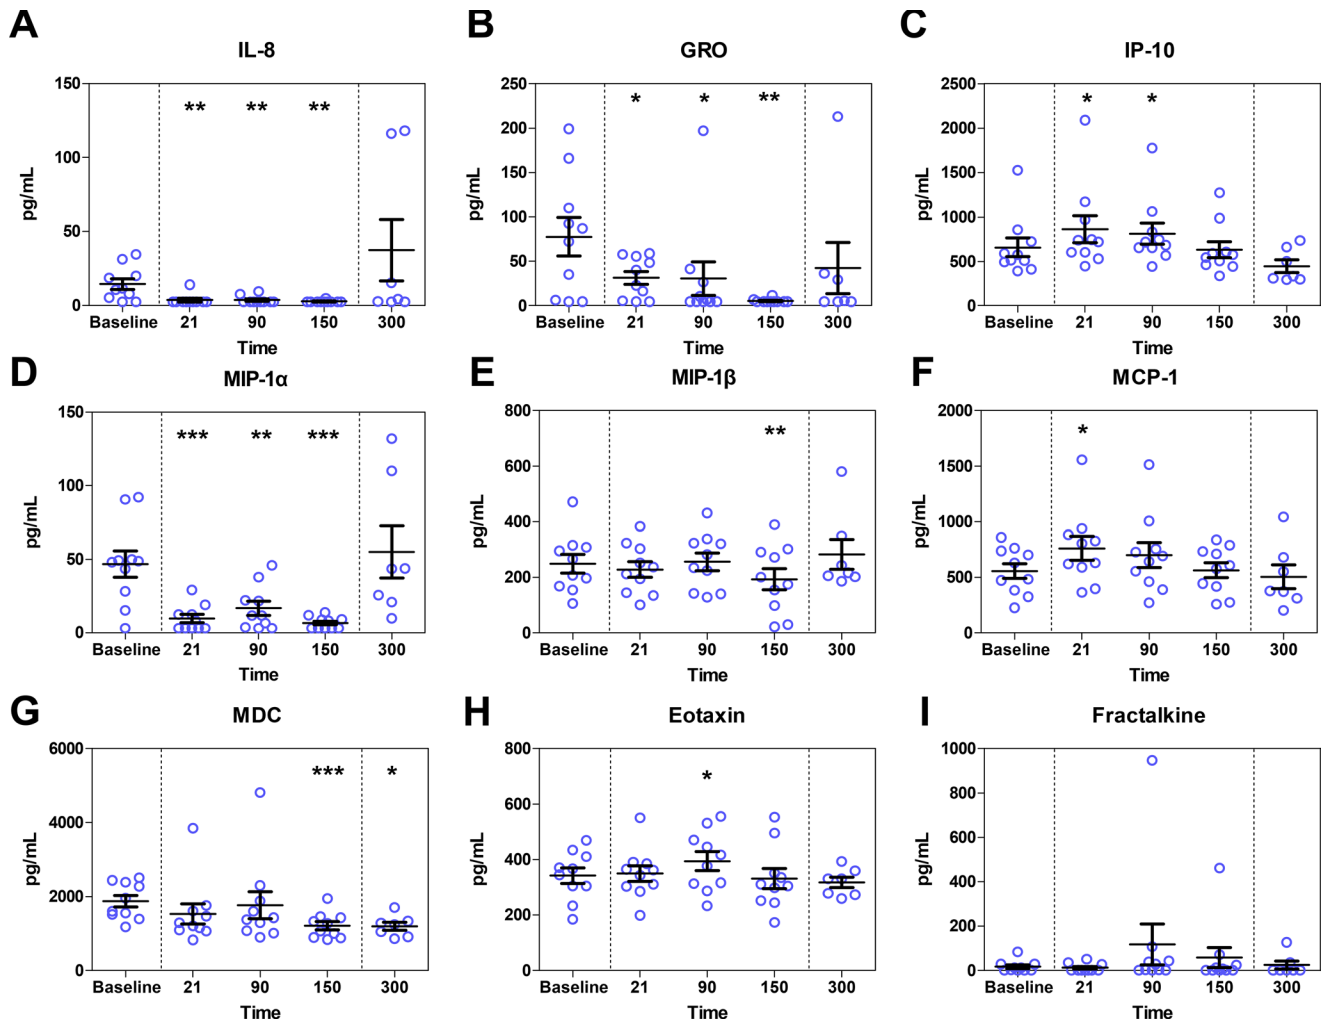

Supplementary Figure 6: The serum cytokine IL-8, GRO, IP-10, MIP-1alpha, MIP1-beta, MCP-1, MDC, Eotaxin and Fractalkine concentration at different time points ( $n = 10$ ).

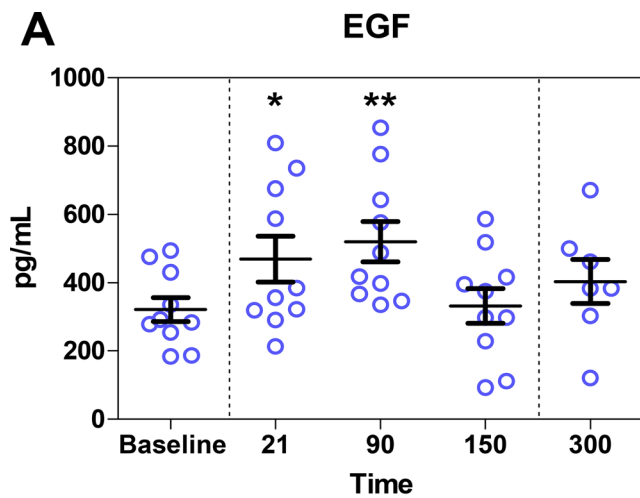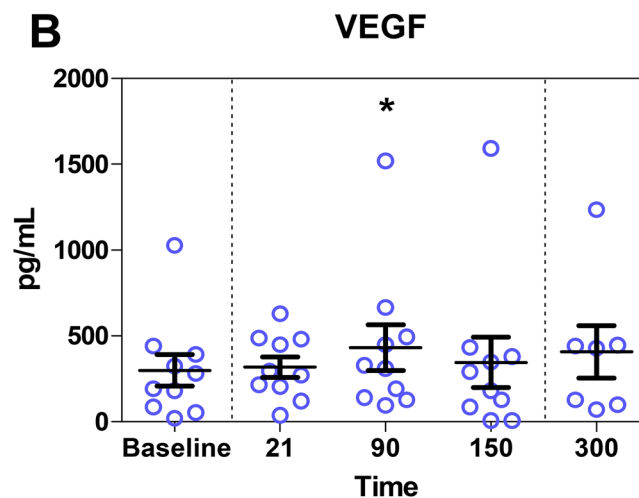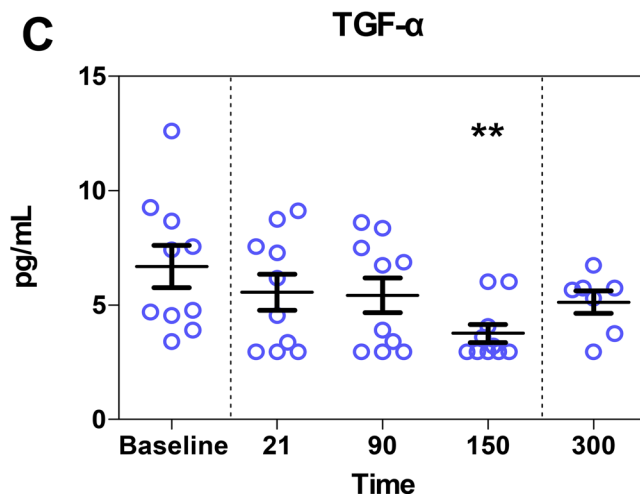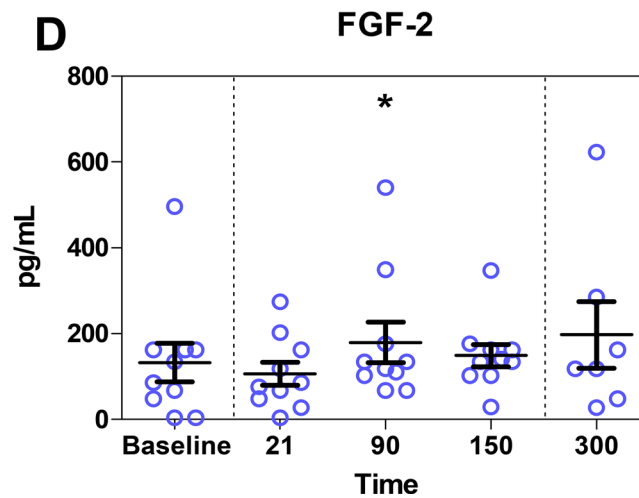

Supplementary Figure 7: The serum EGF, VEGF, TGF-alpha and FGF-2 concentration at different time points ( $n = 10$ ).

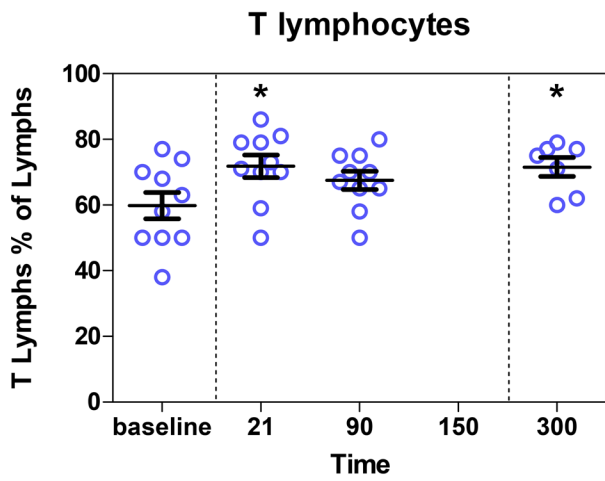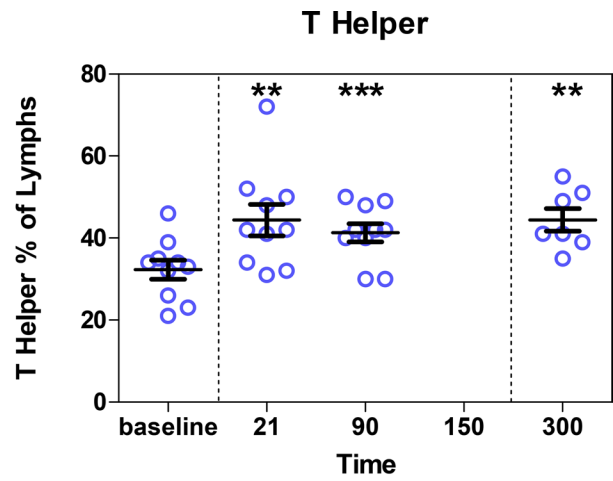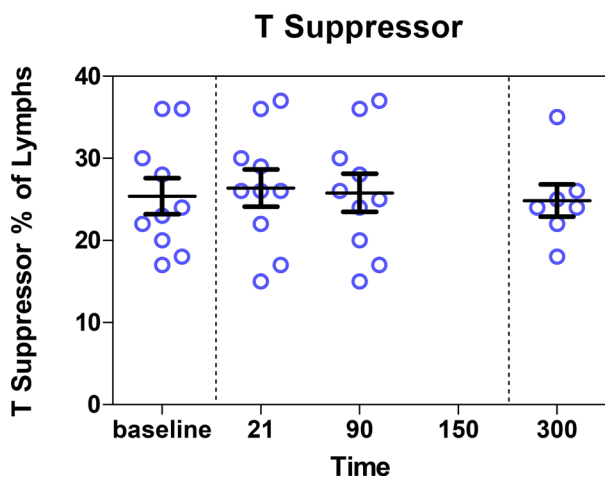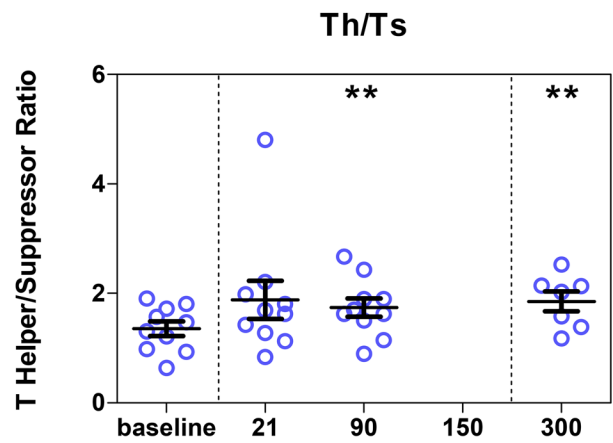

Supplementary Figure 8: The lymph cell percentage at different time points ( $n = 10$ ).

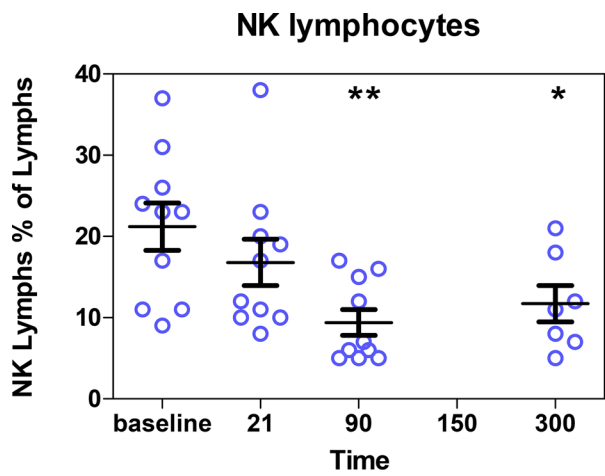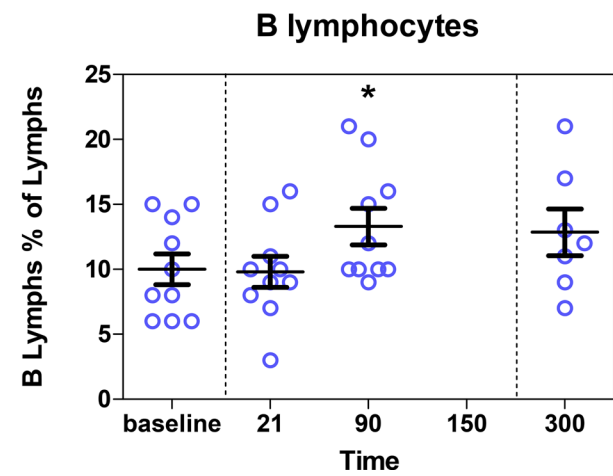

Supplementary Figure 9: The lymph cell percentage at different time points ( $n = 10$ ).

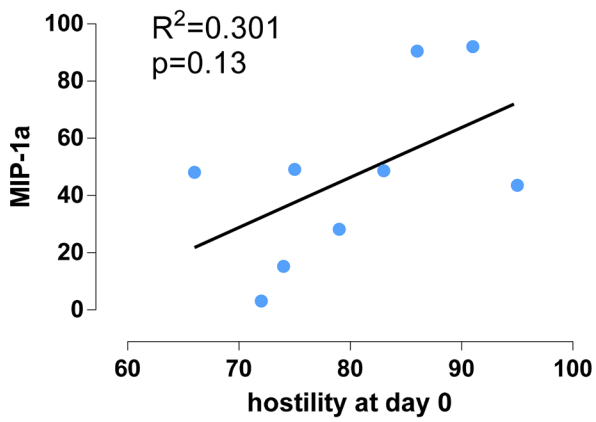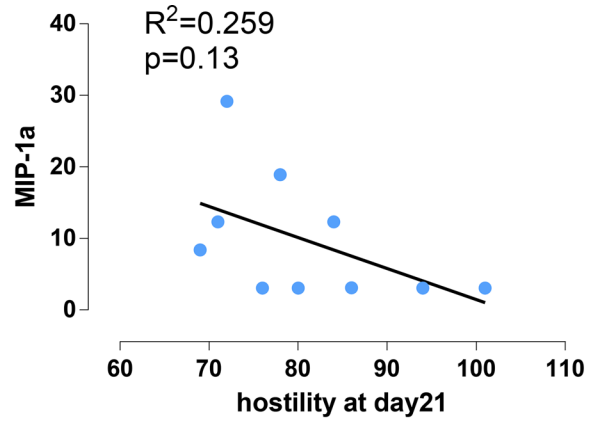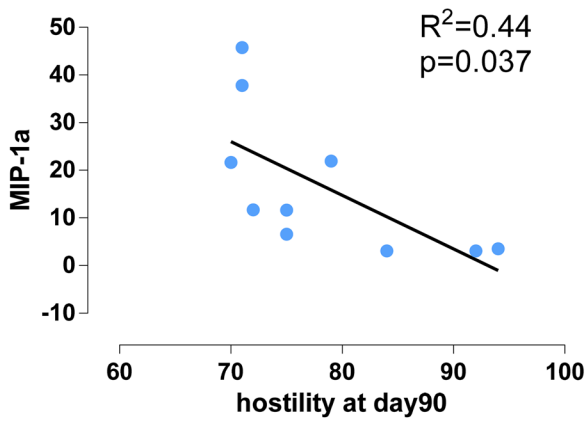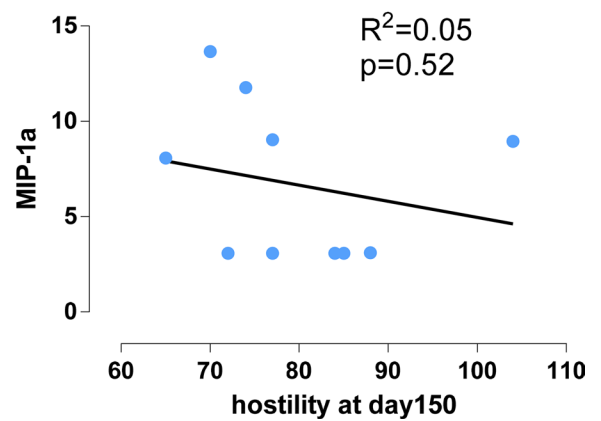

Supplementary Figure 10: The individual difference in hostility is correlated to MIP-1alpha concentration ( $n = 10$ ).



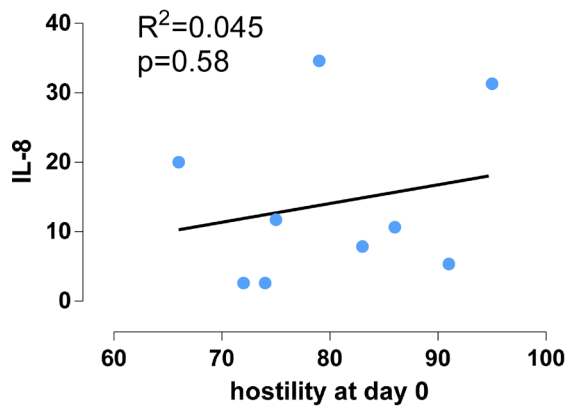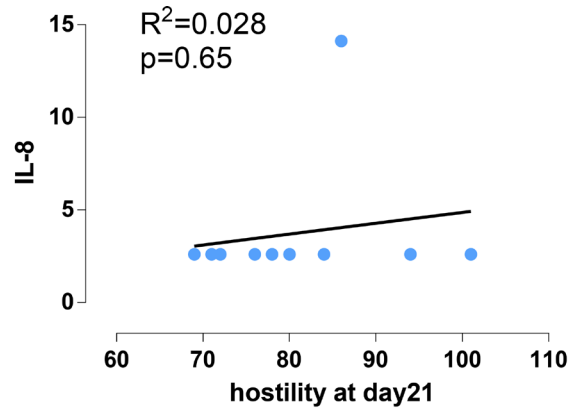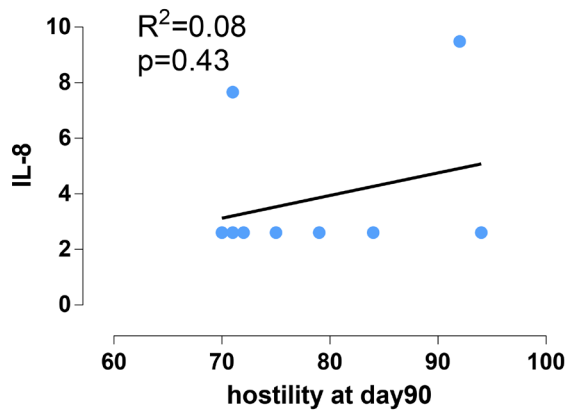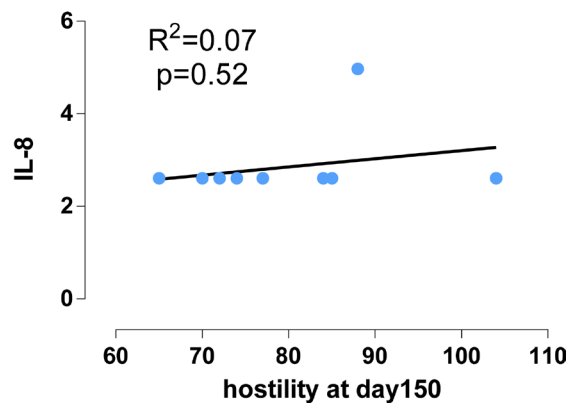

Supplementary Figure 11: The individual difference in hostility is not correlated to IL-8 concentration ( $n = 10$ ).

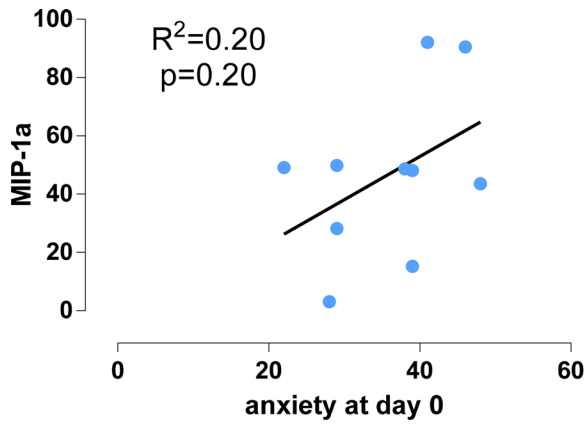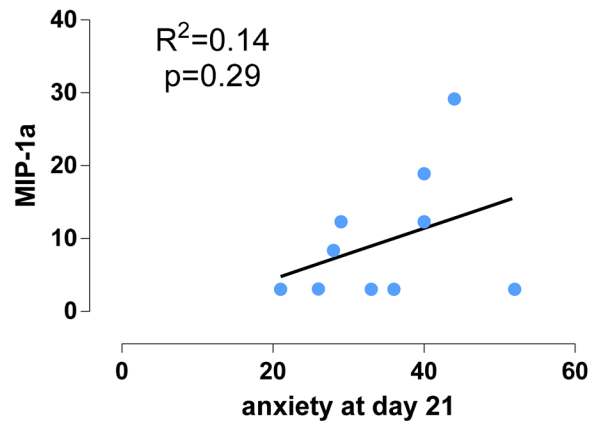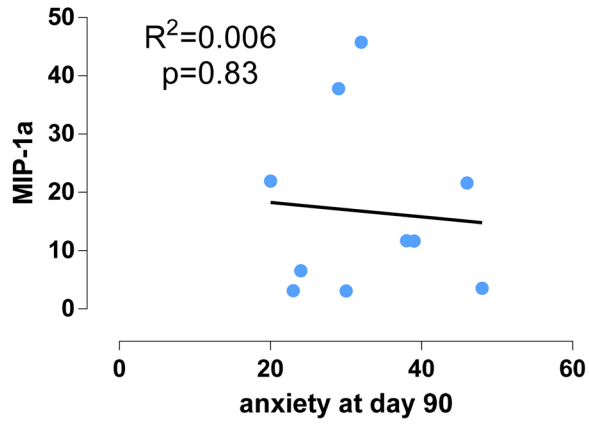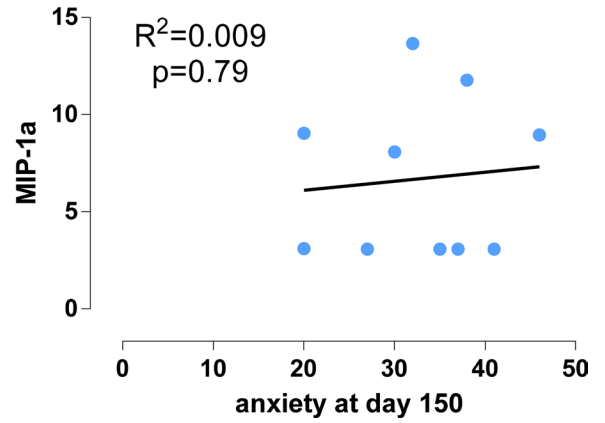

Supplementary Figure 12: The individual difference in anxiety is not correlated to MIP-1alpha concentration ( $n = 10$ ).

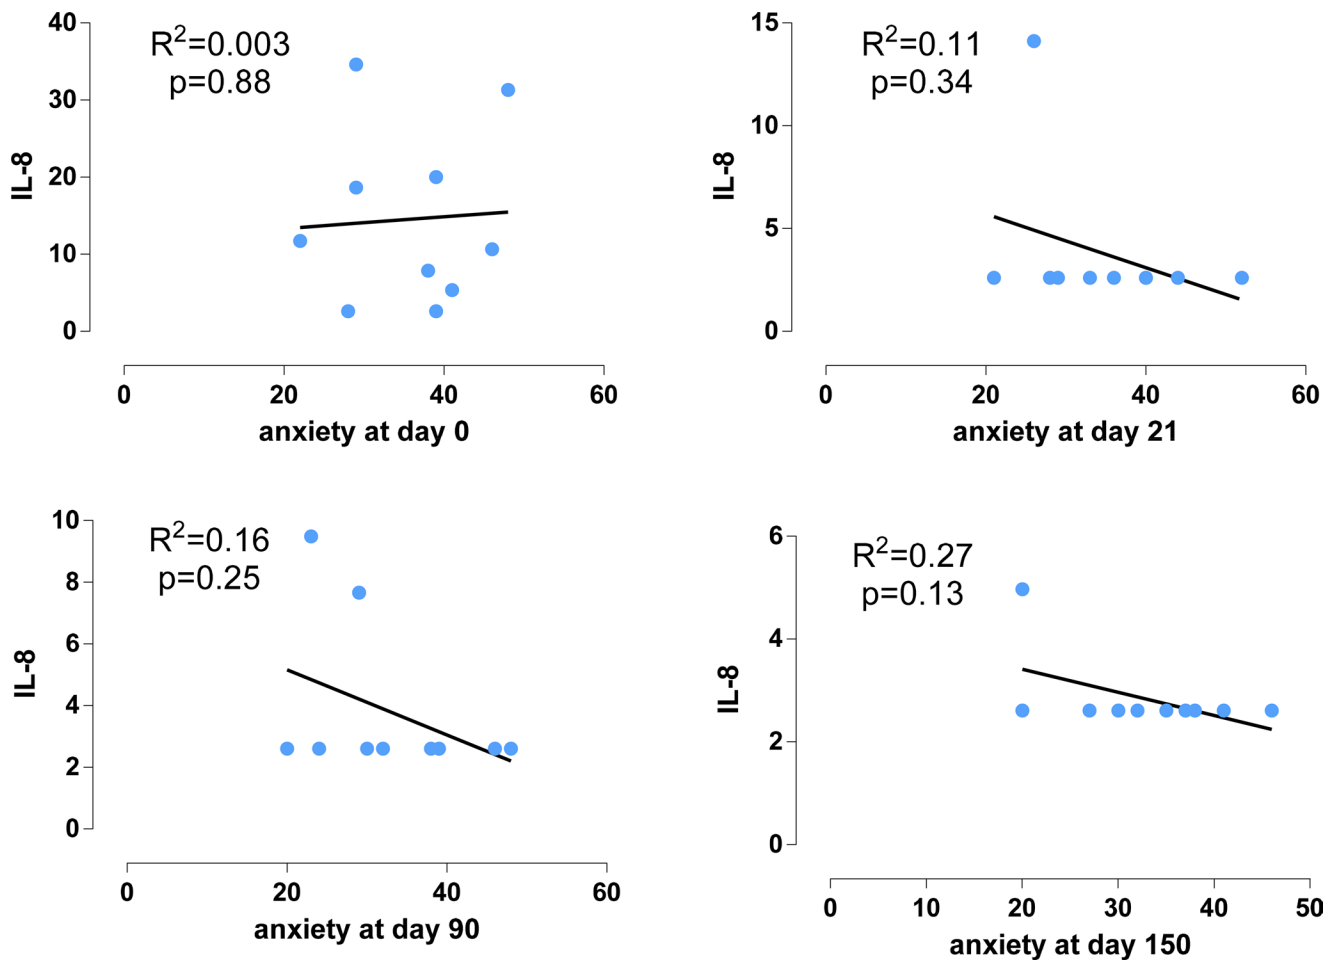

Supplementary Figure 13: The individual difference in anxiety is not correlated to IL-8 concentration ( $n = 10$ ).

**Supplementary Table 1: Optimal cut-off value, area under the ROC-curve (Area), and diagnostic sensitivity and specificity of statistically significant biochemical markers**

| Name                            | Area  | Sig     | Cut-off value | Sensitivity | Specificity% |
|---------------------------------|-------|---------|---------------|-------------|--------------|
| <b>MIP-1<math>\alpha</math></b> | 0.882 | < 0.001 | 25.06         | 90.0        | 80.0         |
| <b>IL-8</b>                     | 0.863 | 0.001   | 7.765         | 93.3        | 70.0         |
| <b>MDC</b>                      | 0.780 | 0.009   | 1492.5        | 73.3        | 80.0         |
| <b>GRO</b>                      | 0.763 | 0.014   | 30.725        | 76.7        | 70.0         |
| <b>IL-6</b>                     | 0.735 | 0.028   | 0.985         | 60.0        | 90.0         |
| <b>TGF-<math>\alpha</math></b>  | 0.732 | 0.030   | 4.305         | 56.7        | 80.0         |
| <b>EGF</b>                      | 0.705 | 0.055   | 340.5         | 66.7        | 70.0         |

The sensitivity and specificity of potential biomarkers reflected by ROC-curve
